# Supplementary material
Source: PubMed Central journal article supplement (PMC3340043)
Supplement: 1116014109_pnas.1116014109_SI.pdf [file 1116014109_pnas.1116014109_SI.pdf]

Rahmstorf et al. (12), the additional freshwater forcing is added into the North Atlantic between 20 and 50°N with an initial value of 200 m<sup>3</sup>/s. This freshwater forcing increases linearly every year with an amount of 200 m<sup>3</sup>/s until the Atlantic meridional overturning circulation (AMOC) shuts down. Then this additional freshwater forcing linearly decreases 200 m<sup>3</sup>/s per year until the additional freshwater forcing becomes zero. This initial additional freshwater flux is very small and the rate of increment/decrement later on is also very slow (it takes 500 model years for the added freshwater forcing to increase by 0.1 Sv [ $\text{Sv} \equiv 10^6 \text{ m}^3 \text{ s}^{-1}$ , or one million cubic meters per second]). Thus these should be sufficient to keep the AMOC in a quasiequilibrium state throughout our simulation. The climate boundary condition used in these simulations is present-day.

In the open Bering Strait simulation, the AMOC collapses after 2,200 years with a peak freshwater forcing of 0.44 Sv. In the closed Bering Strait simulation, the AMOC collapses after 2,100 years with a peak freshwater forcing of 0.42 Sv. In this latter experiment, the AMOC restarts at about year 3,400, with a freshwater forcing of 0.14 Sv. Thus in our closed Bering Strait simulation, the interval of freshwater forcing for an AMOC from active to collapse is 0.28 Sv, similar to that shown in Rahmstorf et al. (12).

The simulations discussed here were carried out at National Energy Research Scientific Computing Center (NERSC) at Lawrence Berkeley National Laboratory. The model simulations run about 15 model years in one calendar day, and one whole simulation took about a year and half to finish.

**d. Justification for the use of the present-day climate boundary conditions.** In our open and closed Bering Strait simulations, the present-day climate boundary conditions are used. Since this is our first attempt to isolate the effect of the Bering Strait opening/closure on AMOC hysteresis, and either present-day or glacial background climate could not fit both of our twin experiments, we decided to use the present-day background climate. This is because of concern about possible abrupt climate transitions due to a sudden collapse of the AMOC in a future warmer climate. For example, the present-day background climate will not fit the closed Bering Strait simulation, but a glacial condition will not really fit the open Bering Strait simulation either. Here what we want to examine is if the AMOC hysteresis is a plausible mechanism to explain past abrupt climate transitions during glacial time, and why these abrupt climate transitions did not occur during the Holocene, even though the freshwater runoff from the melting ice sheet was still huge, especially during the first half of the Holocene. More importantly, if significant mass loss from the Greenland and Antarctic ice sheets would happen in the future warmer climate, we would like to know whether abrupt climate transitions would occur. Moreover, as suggested by ref. 14, the basic physical processes governing the response of the AMOC to the freshwater forcing in the North Atlantic under present-day or last glacial maximum conditions are essentially the same with a closed Bering Strait. Therefore, we judged that the present-day climate boundary condition would serve our purpose.

**2. Significance of this study in comparison with other studies. a. A comparison of this study with EMIC-type studies.** The purpose of this study is to address AMOC hysteresis, and to test the hypothesis of whether changes of sea level, especially the closure of the Bering Strait, can affect AMOC behavior. As indicated in the previous section, the initial freshwater forcing and the subsequent increment/decrement of this freshwater forcing are so slow in our simulations, it is sufficient to keep the AMOC in a quasiequilibrium state throughout our simulations. This feature also makes our simulations differ significantly from many previous freshwater hosing type simulations using coupled models (13, 14). What has been tested in those simulations is only the AMOC's

response to a weak/strong (0.1 Sv/1 Sv) pulse of freshwater forcing in the subpolar North Atlantic which typically lasts only about 100 yrs. Afterwards this added freshwater is completely removed. Our simulations also differ from the AMOC hysteresis simulations using earth system models of intermediate complexity (EMICs). In the EMICs, many physical processes are simplified. For example, in Rahmstorf et al. (12), the EMICs use either a zonally averaged atmospheric model coupled to a zonally averaged ocean model, or a zonally averaged or an energy balance atmospheric model coupled to a coarse resolution ocean model (with a horizontal resolution of 3 degrees or more, and also a much coarser vertical resolution, such as 25 levels or less). Therefore, this type of model cannot simulate the full interactions among the air, sea, land, and sea ice systems, and the impact of the Bering Strait on the AMOC can, in general, not be properly simulated. The results from EMIC simulations, in general, agree qualitatively with AOGCMs under present-day or preindustrial climate conditions, such that a weaker/collapsed AMOC would induce a cooling effect in the North Atlantic. However, the magnitude of the temperature change in the North Atlantic is usually much weaker in the EMICs than in the AOGCMs (13).

**b. The difference of our approach with previous studies.** The idea that abrupt climate transitions can only occur during glacial times has been proposed before, e.g. ref. 15, 16, and they also suggested that the Bering Strait may have played a crucial role in these abrupt climate transitions. But in those studies, the proposed ideas are mostly speculation, not a solid demonstration. Here we put it into a more quantitative framework through a totally different approach—studying the role of the Bering Strait opening/closure on the AMOC hysteresis in a fully coupled, relatively high resolution state-of-the-art climate model. For example, the horizontal resolution in the CCSM3 ocean component is 1 degree latitude-longitude with finer resolution in the equatorial tropics and the subpolar North Atlantic. Therefore the effect of the Bering Strait on AMOC is more properly simulated in our model as demonstrated in a few previous studies (14, 16, 17). For example, the simulated Bering Strait throughflow is about 0.8 Sv in this version of the CCSM3 (Fig. S3), agreeing well with observations (18). Moreover, to more accurately test the Bering Strait's impact on AMOC hysteresis, our simulations are designed in such a way so that everything is identical in the two simulations except that in one the Bering Strait is open, and in the other the Bering Strait is closed. This mimics the sea level change during the last glacial period based on the reconstructed global sea level changes that suggest abrupt climate transitions occurred mostly when the global sea level was about 50 m below present-day level (Fig. 1). What we found here in our simulations is that the AMOC hysteresis, an important mechanism to explain the past abrupt climate transitions, only exists when the Bering Strait is closed. With an open Bering Strait, the AMOC hysteresis is almost nonexistent. Therefore, our results are fundamentally different from De Bore and Nof (15) although we both emphasized the importance of the Bering Strait closure. What's unique here is that we point out that if the AMOC hysteresis is a plausible mechanism to explain the past abrupt climate transitions, the closure/opening of the Bering Strait has fundamentally changed the AMOC hysteresis in such a way that makes abrupt climate transitions occur more frequently during glacial times when the Bering Strait is closed.

In addition, in our simulations we do not assume that the southern ocean winds are the primary driver of the AMOC as in De Bore and Nof (15, 19). As argued by De Bore and Nof (15, 19), the southern ocean winds push 4 Sv of southern ocean water into the Atlantic basin. With an active AMOC, this 4 Sv of southern ocean water will eventually flow southward as North Atlantic deep water. If the AMOC collapses, this 4 Sv of southern ocean water will flow out through the Bering Strait. As demonstrated previously (14, 16, 17) and also in Fig S4, the outflow at

the Bering Strait when the AMOC collapses is only about 1 Sv, though we do have about 4 Sv of southern ocean water being pushed in the Atlantic. Therefore, the effect of the Bering Strait on dissipating the freshwater anomaly in the Atlantic might have been overestimated by De Bore and Nof (15, 19). On the other hand, the counterargument to De Bore and Nof (15) is that strong southern ocean winds also push southern ocean water into the Pacific and Indian Ocean basins. Should this water return to the southern ocean the same way as that pushed into the Atlantic via Bering Strait? Therefore, we speculate that the southern ocean winds may not be the main driver of the AMOC, although to some degree they do contribute to AMOC variations.

In summary, we propose here that the more fundamental causes of the unstable glacial climate and the more stable interglacial climate might rely on the ocean circulation's stability, since the discharge of large amounts of land-based ice occurred in both climates as suggested from reconstructed sea level changes (20) and other paleo proxy data (Fig. 1, ref. 21–25). If the AMOC has played a major role in the climate stability, the absence of AMOC hysteresis with an open Bering Strait and the existence of AMOC hysteresis with a closed Bering Strait might be the key insights to these climate differences.

**c. Influence of the background mixing on AMOC hysteresis.** A few previous studies indicate that AMOC hysteresis might only be an artifact of oceanic mixing coefficients (26–27). Using either an ocean general circulation model or an EMIC-type model, these studies, in general, found AMOC hysteresis when the oceanic background mixing coefficient was large enough. Otherwise AMOC hysteresis disappears. If these results were true for modern state-of-the-art climate models, it would not be possible to explain why, in our simulations, AMOC hysteresis exists only when the Bering Strait is closed. As stated in the previous section, in our simulations everything is identical except the Bering Strait, thus the background diffusivity is exactly the same in both simulations. Therefore, we suspect that the oceanic mixing coefficient might have played a role in AMOC hysteresis, especially in the earlier simple zonally averaged ocean models and the coarse resolution ocean general circulation models which can be run under a big range of diffusivity parameters. But this background diffusivity cannot determine the existence of AMOC hysteresis in modern state-of-the-art global coupled climate models, such as CCSM3.

In fact, in the ocean interior of CCSM3, the background internal wave mixing diffusivity (2) varies in the vertical from  $0.1 \times 10^4 \text{ m}^2 \text{ s}^{-1}$  near the surface to  $1.0 \times 10^4 \text{ m}^2 \text{ s}^{-1}$  in the abyss, and the transition occurs at about 1,000-m depth, which acts as a crude representation of the enhanced deep vertical mixing observed over rough topography (28). These values are unchanged when the model is used for simulations under different climate conditions, such as present-day conditions and last glacial maximum conditions. The choice of these mixing diffusivity coefficients cannot guarantee that a certain strength of the AMOC can be achieved when the ocean model is coupled with other components of the CCSM3, only that it will produce the simulated model climate in reasonable agreement with observations. Actually, the strength of the AMOC in CCSM3 is different from the AMOC in the ocean model standalone simulation forced by the best known observational surface data. This further suggests that the existence or not of AMOC hysteresis in our model is not determined by the diffusivity used here.

**d. A comparison with the results of Liu et al.** It is worth noting that the result from our closed Bering Strait simulation differs in some ways from the result of Liu et al. (29). First, two different versions of the CCSM3 are used. In the present study, a version of the CCSM3 with a T42 horizontal resolution atmospheric model and 1 degree horizontal resolution ocean model is used. In

Liu et al.'s study, a version of the CCSM3 with a T31 horizontal resolution atmospheric model and 3 degree horizontal resolution ocean model was used. In addition, the vertical resolution of the ocean model is 40 levels in our simulation, but 25 levels in Liu et al.'s simulation. These differences produce a few important potentially different behaviors in the models. In the coarse resolution version (T31) of the CCSM3, the representation of the Bering Strait is not good, and deep convection in the North Atlantic is too weak, resulting in a 30% weaker AMOC in comparison to the T42 version of the model under present-day conditions (9). This weaker AMOC could be more sensitive to the external freshwater forcing.

Secondly, most of the freshwater forcing in Liu et al.'s simulation is added directly into the North Atlantic deep convection region between 50 and 70 °N, and part is added into the Gulf of Mexico. In our simulation, the freshwater forcing is added between 20 and 50 °N. More importantly, the initial freshwater forcing in Liu et al.'s simulation, however, is much larger (170 times) than that used in our simulation (0.0345 Sv vs. 0.0002 Sv). The increment/decrement later on is a similar magnitude as we used here or slightly smaller. Thus, it is quite possible that it is this large initial freshwater forcing that throws the AMOC out of the quasiequilibrium state, resulting in a linear slow down of the AMOC as freshwater forcing increases in Liu et al.'s simulation. After the AMOC collapses, the rate of the freshwater forcing decrement in Liu et al.'s simulation is about 50% of that in our simulation, and the AMOC stays in off mode for at least 800 yrs in Liu et al.'s simulation (Fig. S5 in their supporting online material). Then the AMOC restarts abruptly to produce the Billing-Allerød warming event. This more stable off mode, and the abrupt restart of the AMOC in Liu et al.'s simulation, may have produced the AMOC's hysteresis.

On the other hand, because our simulation with a closed Bering Strait is under the same climate boundary condition—the present-day condition, we cannot evaluate how much the glacial boundary condition would modify our results shown here. We speculate that our conclusions reached here would hold up at least qualitatively if the glacial boundary condition was used (see more detailed discussion in the next section). However, this speculation does need to be further investigated and the authors are planning to do so with a set of simulations the same as presented here except with glacial climate boundary conditions. These proposed simulations will take about two years to finish since we need to run each simulation for about 4,000 model years, and this is beyond the scope of the present study.

**3. Discussions of the background climate.** Although the present-day climate boundary condition is used in our experiments, we speculate that this would not significantly affect the application of our results to glacial conditions (note: here and in most of this paper, the glacial time period is defined as 80 to 11 thousand years before present [kyr BP], not the last glacial maximum which is about 21 kyr BP). This speculation is based on a previous study which suggests that the response of the AMOC to added freshwater forcing in the subpolar North Atlantic under present-day and last glacial maximum conditions is qualitatively the same when the Bering Strait is closed (14). In that study, the authors compared simulations with a closed Bering Strait under modern day climate conditions and last glacial maximum climate states. They found that the AMOC's response to a strong pulse of freshwater forcing (1 Sv for 100 yrs) in the subpolar North Atlantic is very similar in both cases regardless of their significantly different background climate. In contrast, the AMOC's response to freshwater forcing with an open Bering Strait under a modern day climate boundary condition is significantly different from those two simulations with a closed Bering Strait. They concluded that the effect of a closed Bering Strait to the divergence of an added

freshwater anomaly in the subpolar North Atlantic is qualitatively the same under modern and last glacial maximum conditions.

Some previous studies using either ocean general circulation models or EMIC-type models suggest that AMOC hysteresis under glacial conditions differ from present-day conditions. For example, some indicate that although AMOC hysteresis was found in both climate conditions, the AMOC hysteresis cycle is narrower during glacial times than in present-day (30, 31) while others suggest that there are two stable modes of the AMOC under present day-conditions: (i) a warm conveyor belt (present-day AMOC) and (ii) an off mode. During glacial times, the evidence indicates that the AMOC had only one stable mode—the cold conveyor belt (32). However, the definition of the glacial conditions in these studies, in general, is the last glacial maximum around 21 thousand years ago. As shown in Fig. 1, most of the abrupt climate transitions did not occur during the last glacial maximum, but occurred instead during the time when the Bering Strait was just closed or nearly closed. This might indicate the climate conditions during the last glacial maximum could be different from other glacial times. One very important point which should be made is that in these models, due to the crudeness in model resolution, the Bering Strait is closed in both present-day and last glacial maximum conditions. Therefore, these simulations are more equivalent to our simulation with a closed Bering Strait. If the major difference of AMOC hysteresis between present-day and the last glacial maximum is the width of the hysteresis cycle, this would imply that our result with a closed Bering Strait would hold if glacial conditions were applied. If the last glacial AMOC hysteresis had indeed been a single stable state, we need to further test how stable it was with the AMOC in both active and off modes in our closed Bering Strait simulation. Preliminary tests show that the AMOC off mode with a closed Bering Strait seems more stable than the AMOC active mode. This suggests that conclusions from our closed Bering Strait simulation might hold for time periods when the glacial climate background was used, pending further investigation.

As we have mentioned in the main text, our results suggest that under modern climate conditions, the AMOC does not have hysteresis behavior. Therefore the AMOC would not collapse suddenly under greenhouse gas induced warming in the future, and consequently would not induce abrupt climate change. As suggested by model simulations (13, 14), a sudden shutdown of the AMOC in the future could occur under very strong freshwater forcing, such as a sudden collapse of the Greenland Ice Sheet. Up to now, it is very uncertain how the Greenland Ice Sheet would respond to greenhouse gas induced warming due to the lack of observations and the lack of understanding of ice sheet dynamics. A recent study (33) indicates that under idealized Greenland Ice Sheet melting scenarios, the AMOC could further weaken in comparison with the simulations which do not include the effect of Greenland Ice Sheet melting in the future. But indications are that the AMOC would not abruptly collapse.

As suggested from the paleoclimate record, the AMOC could have collapsed about 8,200 yrs before present (34) due to the disintegration of the ice dam and the draining of the ice sheet melt water from Lakes Agassiz and Ojibway, sending about 5 to 10 Sv of freshwater into the subpolar North Atlantic (35). Because the

Bering Strait was open at that time, the freshwater anomaly in the North Atlantic was quickly transported out of the North Atlantic to the south and to the north. The part of the freshwater anomaly transported to the north was further transported into the North Pacific via the open Bering Strait as suggested by earlier studies (14, 16, 17). As a result, this abrupt climate change event is much shorter lived in comparison to those that occurred in the last glacial period.

Another way to view the effect of the opening of the Bering Strait at about 10.5 thousand years before present is that only one abrupt climate transition occurred at about 8.2 thousand years ago. However, the temperature changes in Greenland during this abrupt climate transition were less than half of those that occurred during those abrupt climate transitions in the last glacial period (36). Moreover, after the reopening of the Bering Strait due to the loss of land-based ice, the ice mass discharged into the ocean still amounted to about an equivalent 50-m global sea level rise. If the discharge of the land-based ice is the sole reason for the abrupt climate transitions, why did the abrupt climate transition not occur during the Holocene? Therefore, if the AMOC hysteresis was responsible for the past abrupt climate transitions during the glacial times, our simulations suggest that the AMOC hysteresis only exists when the Bering Strait is closed. With an open Bering Strait, the AMOC does not have hysteresis, thus it cannot induce abrupt climate transitions during the Holocene although significant discharge of land-based ice is still ongoing, especially during the first half of the Holocene. In other words, the discharge of the land-based ice into the North Atlantic might be only one of the necessary conditions for the occurrence of the abrupt climate transitions, with the AMOC hysteresis being another one. The lack of AMOC hysteresis due to the opening of the Bering Strait at about 10.5 thousand years before present leads to the stable Holocene climate.

**4. The derivation of the relative sea level at Bering Strait.** Eastern Siberia and Alaska both do not appear to have been extensively glaciated during either the last glacial cycle or MIS 6 (37–39). Therefore, the relative sea level change in the Bering Strait (Fig. 1) is predominantly controlled by the eustatic change and by the hydro-isostatic contributions from the changes in ocean volume and will not be strongly influenced by the assumptions made about the ice sheets. We confirmed this by converting the eustatic sea level (ESL) time series in Fig. 1 to relative sea level (RSL) using a mapping scheme derived from the ICE-5G/VM2 ice history-Earth model combination (40, 41). The full isostatic model has been used here, using the same theory, ice models and rheological parameters previously described in refs. 19 and 42, to predict the sea level change  $\Delta\zeta(\varphi, t)$  as a function of location ( $\varphi$ ) and time ( $t$ ) and palaeo-bathymetry  $h(\varphi, t) = h(\varphi, t_0) - \Delta\zeta(\varphi, t)$  where  $h(\varphi, t_0)$  is the present-day topography. This present-day topography has been extracted from the bathymetric charts of the Admiralty Navigational Chart 4814 (43).

It is worth pointing out that the predicted RSL at the Bering Strait depends on the input ESL time series. Here we used the ESL time series of Lambeck and Chappell (19). The timing of the ESL minima in this time series agrees well with other independent ESL estimates, e.g. Siddall et al. (44).

- Collins W-D, et al. (2006) The Community Climate System Model: CCSM3. *J Climate* 19:2122–2143.
- Danabasoglu G, et al. (2006) Diurnal coupling in the tropical oceans of CCSM3. *J Climate* 19:2347–2365.
- Smith R-D, Kortas S, Meltz B (1995) Curvilinear coordinates for global ocean models. *Los Alamos National Laboratory Tech. Rep.* LA-UR-95-1146, 38 pp.
- Gent, P. R., J. C. McWilliams (1990) Isopycnal mixing in ocean circulation models. *J Phys Oceanogr* 20:150–155.
- Large W-G, McWilliams J-C, Doney S-C (1994) Oceanic vertical mixing: A review and a model with a nonlocal boundary layer parameterization. *Rev Geophys* 32:363–403.
- Meehl G-A, et al. (2006) Climate change projections for the twenty-first century and climate change commitment in the CCSM3. *J Climate* 19:2597–2616.
- Ganachaud A, Wunsch (2000) Improved estimates of global ocean circulation, heat transport and mixing from hydrographic data. *Nature* 408:453–457.
- Pickard G-L, W-J Emery (1990) *Descriptive Physical Oceanography, An Introduction*. 5th Edition, Pergamon, Oxford.
- Bryan F-O, et al. (2006) Response of the North Atlantic Thermohaline circulation and ventilation to increasing carbon dioxide in CCSM3. *J Climate* 19:2382–2397.
- Otto-Bliessner B-L, E-C Brady (2010) The sensitivity of the climate response to the magnitude and location of freshwater forcing: last glacial maximum experiments. *Quaternary Sci Rev* 29:56–73.
- Peltier W-R, Vettoretti G, Stastna M (2006) Atlantic meridional overturning and climate response to Arctic Ocean freshening. *Geophys Res Lett* 33:L06713, doi:10.1029/2005GL025251.





## Mean surface ocean properties in March

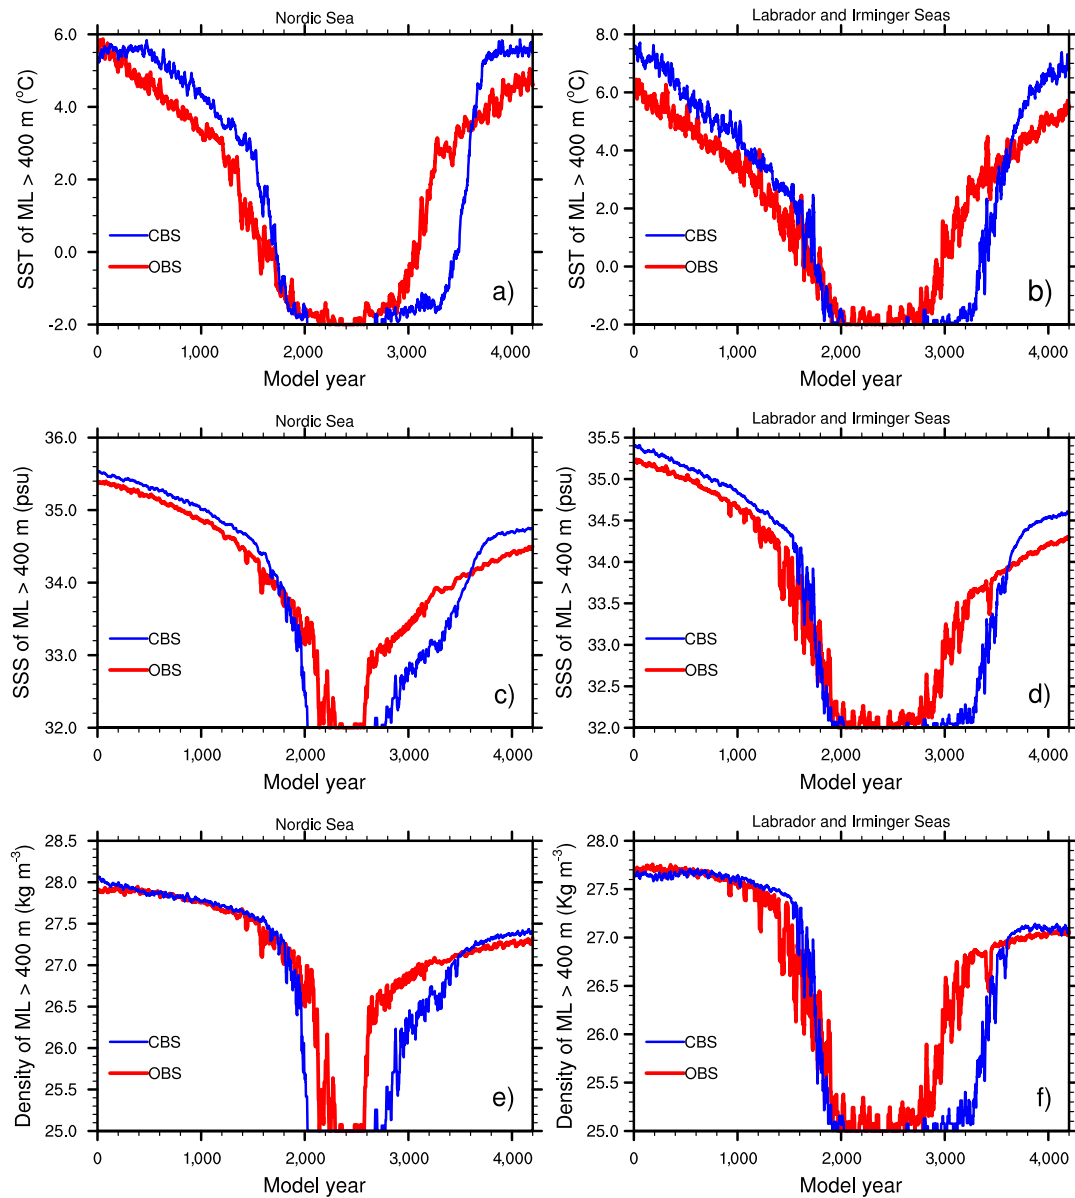

**Fig. S3.** The changes of the surface oceanic properties in the Nordic Sea (*Left*), and the Labrador and Irminger Seas (*Right*) for the regions where the March maximum mixed layer depth is deeper than 400 meters. Panels a and b are for the sea surface temperature (°C); panels c and d are for the sea surface salinity (psu); and panels e and f are for the surface potential density (kg/m<sup>3</sup>). From this figure, it is clear that the changes of the surface density are primarily controlled by the changes of the sea surface salinity in our simulations. The contribution from surface temperature to surface potential density is small most of the time.







## Ocean model native grid properties

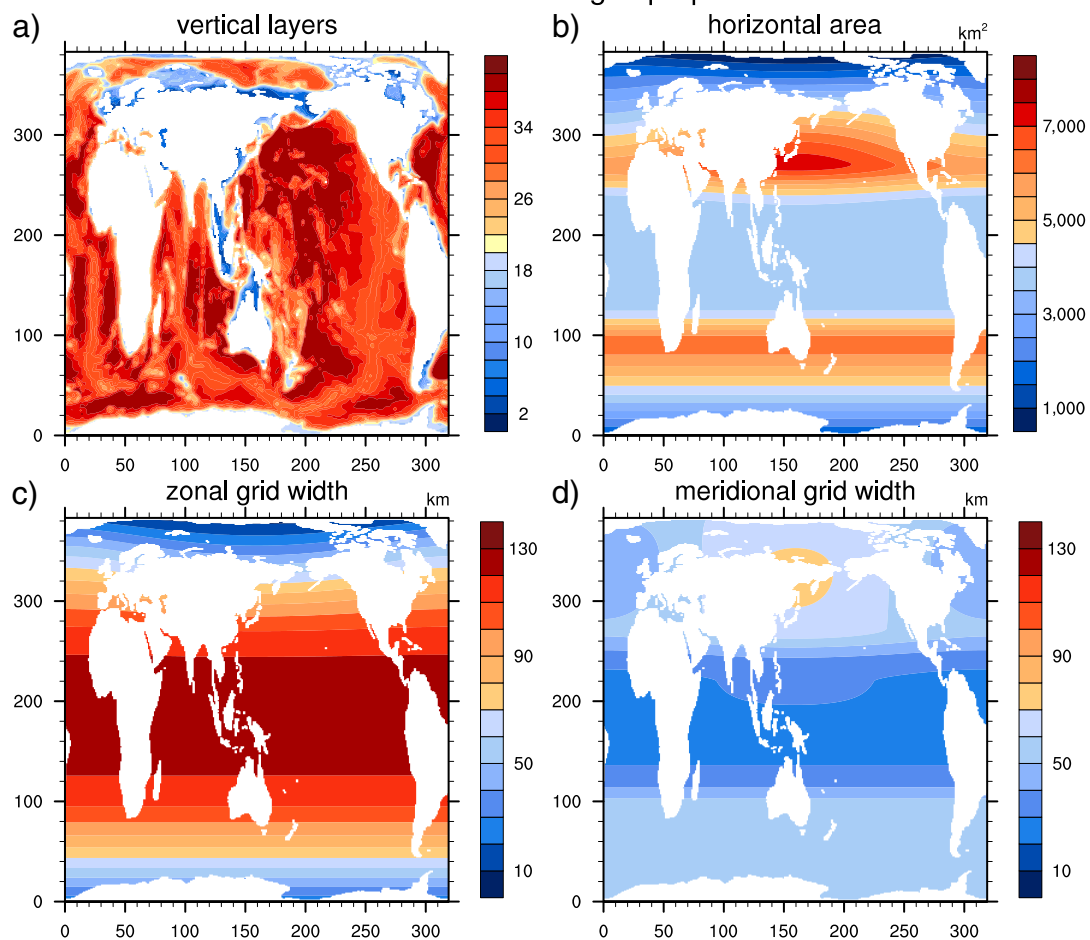

**Fig. S7.** The ocean model native grid properties. (A) is the number of layers at each ocean grid point which varies from 3 level to 40 levels; (B) is the cell area for each ocean grid point which varies from  $545 \text{ km}^2$  to  $7,289 \text{ km}^2$ ; (C) is the grid cell width in the zonal direction which varies from  $8.6 \text{ km}$  to  $125 \text{ km}$ ; (D) is the grid cell width in the meridional direction which varies from  $28.6 \text{ km}$  to  $72 \text{ km}$ .
